# Supplementary material
Source: MDPI journal article supplement (https://www.mdpi.com/2073-4344/11/7/855)
Supplement: s1 [file s1]

**Supplementary file**

**For**

**Photocatalytic Treatment of Wastewater Containing Simultaneous Organic  
and Inorganic Pollution: Competition and Operating Parameters Effects**

Ahmed Amine Azzaz<sup>1,2</sup>, Salah Jellali<sup>3</sup>, Nasser Ben Harharah Hamed<sup>4</sup>, Atef El Jery<sup>4</sup>, Lotfi Khezami<sup>5</sup>,  
Aymen Amin Assadi<sup>6</sup> and Abdeltif Amrane<sup>6,\*</sup>

1        Environnements dynamiques et territoires de la Montagne, Université Savoie Mont-Blanc, EDYTEM, 5 Boulevard de la  
Mer Caspienne, 73370 Le Bourget-du-Lac, France ; [ahmed-amine.azzaz@univ-smb.fr](mailto:ahmed-amine.azzaz@univ-smb.fr);

2        Water Research and Technologies Center, Wastewater Treatment Laboratory, University of Carthage, P.O. Box 273,  
Soliman 8020, Tunisia;

3        PEIE Research Chair for the Development of Industrial Estates and Free Zones, Center for Environmental Studies and  
Research, Sultan Qaboos University, Al-Khoud 123, Oman; [s.jellali@squ.edu.om](mailto:s.jellali@squ.edu.om);

4        Department of Chemical Engineering, College of Engineering, King Khalid University, Abha 61411, Saudi Arabia;  
[hharharah@kku.edu.sa](mailto:hharharah@kku.edu.sa) (B.H.H.N.); [ajery@kku.edu.sa](mailto:ajery@kku.edu.sa) (E.J.A.);

5        Department of Chemistry, College of Sciences, Imam Mohammad Ibn Saud Islamic University, P.O. Box 5701, Riyadh  
11432, Saudi Arabia; [lkhezami@gmail.com](mailto:lkhezami@gmail.com) ;

6        Univ Rennes, École Nationale Supérieure de Chimie de Rennes, CNRS, ISCR (Institut des Sciences Chimiques de  
Rennes) – UMR 6226, F-35000 Rennes, France; [aymen.assadi@ensc-rennes.fr](mailto:aymen.assadi@ensc-rennes.fr) ;

\*        Correspondence: [abdelatif.amrane@univ-rennes1.fr](mailto:abdelatif.amrane@univ-rennes1.fr) ; Tel.: +33-(0)-2-23-23-40-00

**Catalysts – MDPI**

**1 Tables and 2 Figures**

**Figure S1.** The photocatalytic set-ups during this study

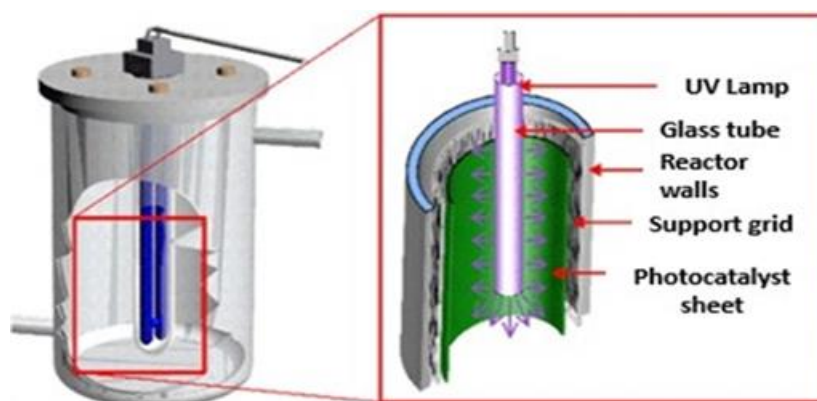

**Figure S2.** SEM/EDX analysis of the TiO<sub>2</sub> catalyst sample

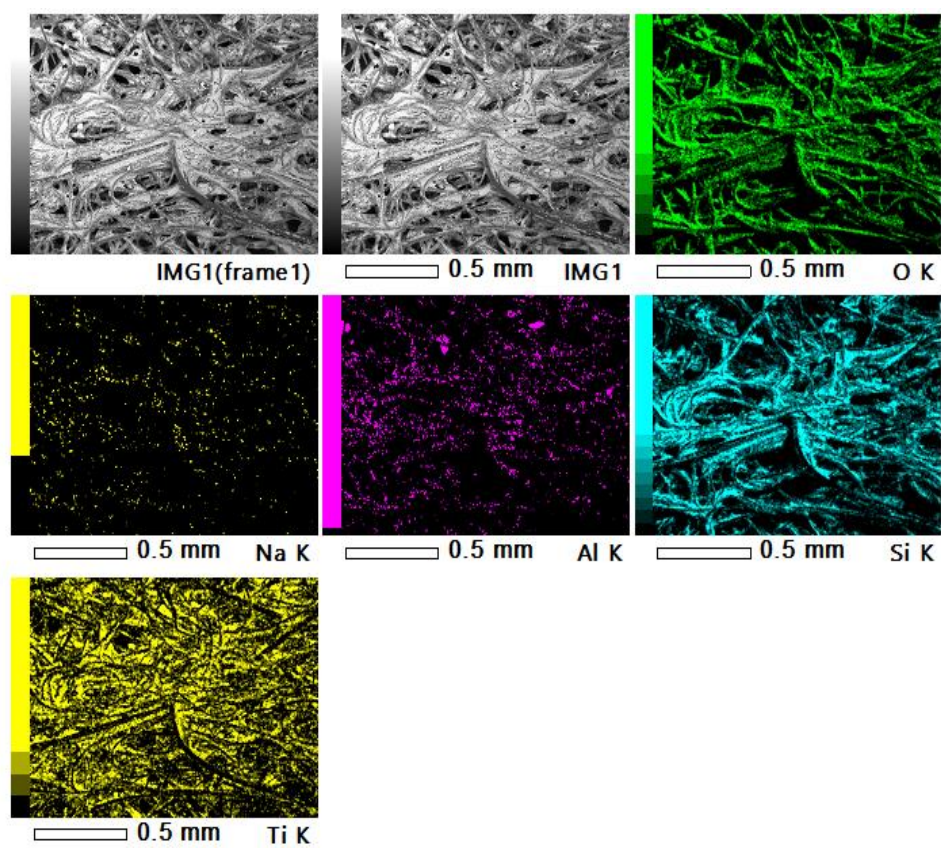

**Table S1.** Used kinetic models and their linear forms

| Model               | Equation                             | Linear Form                                              |
|---------------------|--------------------------------------|----------------------------------------------------------|
| Pseudo-first-order  | $\frac{dQ_t}{dt} = k_1(Q_e - Q_t)$   | $Ln(Q_e - Q_t) = LnQ_{el} - k_1t$                        |
| Pseudo-second-order | $\frac{dQ_t}{dt} = k_2(Q_e - Q_t)^2$ | $\frac{t}{Q_t} = \frac{1}{k_2Q_e^2} + \frac{1}{Q_{el}}t$ |
